# Supplementary material for: Prognostic Factors of Death in 151 Adults With Hemophagocytic Syndrome: Etiopathogenically Driven Analysis
Source: PubMed Central journal article supplement — Mayo Clin Proc Innov Qual Outcomes. 2018 Aug 1;2(3):267–76. doi: 10.1016/j.mayocpiqo.2018.06.006 (PMC6132215; doi:10.1016/j.mayocpiqo.2018.06.006), 2018-08-01
Supplement: mmc1.pdf [file mmc1.pdf]

**Supplemental Table 1.** Infectious triggers: list of microorganisms identified

|                                                                 | <b>Number of cases</b> |
|-----------------------------------------------------------------|------------------------|
| <b>Patients with infectious trigger<sup>a</sup></b>             | 95 (62.9%)             |
| <b>a) VIRUSES</b>                                               | <b>47</b>              |
| Epstein-Barr                                                    | 18                     |
| Cytomegalovirus                                                 | 11                     |
| Parvovirus B19                                                  | 8                      |
| HIV                                                             | 6                      |
| Herpes simplex                                                  | 4                      |
| Herpesvirus 6                                                   | 2                      |
| Influenza                                                       | 1                      |
| Herpes zoster                                                   | 1                      |
| <b>b) BACTERIA</b>                                              | <b>33</b>              |
| <i>Mycobacterium</i>                                            | 9                      |
| <i>Staphylococcus spp</i>                                       | 3                      |
| <i>Escherichia coli</i>                                         | 3                      |
| <i>Pseudomonas spp</i>                                          | 3                      |
| <i>Coxiella burnetti</i>                                        | 2                      |
| <i>Streptococcus spp</i>                                        | 2                      |
| <i>Mycoplasma spp</i>                                           | 1                      |
| <i>Enterobacter spp</i>                                         | 1                      |
| <i>Acinetobacter spp</i>                                        | 1                      |
| Bacterial infection with no isolated microorganism <sup>b</sup> | 12                     |
| <b>d) FUNGI</b>                                                 | <b>13</b>              |
| <i>Candida spp</i>                                              | 6                      |
| <i>Pneumocystis jirovecii</i>                                   | 3                      |
| <i>Cryptosporidium</i>                                          | 1                      |
| <i>Aspergillus spp</i>                                          | 2                      |
| <i>Mucor</i>                                                    | 1                      |
| <b>c) PARASITES</b>                                             | <b>9</b>               |
| <i>Leishmania spp</i>                                           | 8                      |
| <i>Treponema spp</i>                                            | 1                      |

<sup>a</sup>Patients may have more than one infectious trigger identified

<sup>b</sup>Lack of isolation of a specific bacteria; diagnosis was suspected and accordingly treated by clinical and laboratory parameters supporting a bacterial infection of specific organs (pulmonary, urinary, gastrointestinal, skin, articular)
