# Supplementary material for: Prognostic Factors of Death in 151 Adults With Hemophagocytic Syndrome: Etiopathogenically Driven Analysis
Source: PubMed Central journal article supplement — Mayo Clin Proc Innov Qual Outcomes. 2018 Aug 1;2(3):267–76. doi: 10.1016/j.mayocpiqo.2018.06.006 (PMC6132215; doi:10.1016/j.mayocpiqo.2018.06.006), 2018-08-01
Supplement: mmc2.pdf [file mmc2.pdf]

**Supplemental Table 2.** Therapeutic interventions

| <b>Drugs</b>                             | <b>n</b> | <b>%</b> |
|------------------------------------------|----------|----------|
| <b><i>Glucocorticoids</i></b>            | 129      | 85.43    |
| <b><i>Immunosuppressive drugs</i></b>    |          |          |
| Cyclosporine A                           | 28       | 18.54    |
| Metothrexate                             | 4        | 2.65     |
| Tacrolimus                               | 3        | 1.99     |
| Azathioprine                             | 1        | 0.66     |
| <b><i>Biological agents</i></b>          |          |          |
| Rituximab                                | 12       | 7.95     |
| Infliximab                               | 1        | 0.66     |
| Anakinra                                 | 1        | 0.66     |
| <b><i>Other therapies</i></b>            |          |          |
| Immunoglobulins                          | 22       | 14.57    |
| Plasma exchanges                         | 1        | 0.66     |
| <b><i>Chemotherapy</i></b>               |          |          |
| Etoposide-based                          | 28       | 18.54    |
| Others                                   | 20       | 13.25    |
| <b>Therapeutic regimens</b>              | <b>n</b> | <b>%</b> |
| <b><i>Glucocorticoid monotherapy</i></b> | 49       | 32.45    |
| <b><i>ID/IVIG/Biologics</i></b>          | 39       | 25.83    |
| <b><i>Chemotherapy</i></b>               |          |          |
| Etoposide-based                          | 28       | 18.54    |
| Other regimens                           | 16       | 10.60    |
| <b><i>No specific therapy</i></b>        | 19       | 12.58    |
