# Supplementary material for: Prognostic Factors of Death in 151 Adults With Hemophagocytic Syndrome: Etiopathogenically Driven Analysis
Source: PubMed Central journal article supplement — Mayo Clin Proc Innov Qual Outcomes. 2018 Aug 1;2(3):267–76. doi: 10.1016/j.mayocpiqo.2018.06.006 (PMC6132215; doi:10.1016/j.mayocpiqo.2018.06.006), 2018-08-01
Supplement: mmc3.pdf [file mmc3.pdf]

**Supplemental Table 3.** Large series (n>50) including adult HLH patients with unselected etiologies

| Author | Year | Country | Patients | Admission | Etiologies                                                                                                            | Mortality    |                | Prognostic factors                                                                                                                                                                    |                                                                                                                                                   | Outcomes                                                          | Main outcome analysis                                                                                                                                                                    |                                                                                                                                                    |
|--------|------|---------|----------|-----------|-----------------------------------------------------------------------------------------------------------------------|--------------|----------------|---------------------------------------------------------------------------------------------------------------------------------------------------------------------------------------|---------------------------------------------------------------------------------------------------------------------------------------------------|-------------------------------------------------------------------|------------------------------------------------------------------------------------------------------------------------------------------------------------------------------------------|----------------------------------------------------------------------------------------------------------------------------------------------------|
|        |      |         |          |           |                                                                                                                       | Early        | Overall        | Univariate                                                                                                                                                                            | Multivariate                                                                                                                                      | Primary (secondary)                                               | Univariate                                                                                                                                                                               | Multivariate                                                                                                                                       |
| Buyse  | 2010 | France  | 56       | ICU       | Tumoral diseases (77%)<br>Infections (41%)<br>Undetermined (7%)                                                       | 39% (ICU)    | 52% (Hospital) | SOFA scores, platelet count, hemophagocytosis, shock at ICU admission, life-sustaining therapies, Castleman's disease, B cell lymphoma                                                | Shock at ICU admission, platelet count (risk factor) Castleman's disease and B-cell lymphoma (protective factor)                                  | Hospital mortality (died in the ICU or before hospital discharge) | Chi-square test or Fisher's exact test (categorical variables)<br>Wilcoxon or Kruskal-Wallis test (continuous variables)                                                                 | Logistic regression model (forward stepwise selection procedure using all variables associated with hospital mortality in the univariate analysis) |
| Barba  | 2015 | France  | 71       | ICU       | Neoplasia (30%)<br>Infection (28%)<br>Autoimmune disease (10%)<br>HLH of unknown origin (26%)                         | 38% (28-day) | 68% (Hospital) | Age, SOFA scores (the 28-day mortality)<br>Age, SOFA scores, lymphoma related HLH or HLH of unknown origin, thrombocytopenia, need for renal replacement therapy (hospital mortality) | Age, SOFA scores (the 28-day mortality)<br>Age, SOFA scores, lymphoma related HLH or HLH of unknown origin, thrombocytopenia (hospital mortality) | 28-day mortality (hospital mortality)                             | Chi-square test or Fisher's test (categorical variables)<br>The Mann-Whitney U nonparametric test (continuous variables)                                                                 | Binary logistic regression (backward stepwise selection method using all variables associated with a p-value <0.10 in the univariate analysis)     |
| Li     | 2014 | China   | 103      | Hospital  | Hematologic malignancies (48%)<br>Infectious disease (23%)<br>Autoimmune diseases (14%)<br>Unknown origin (23%)       | ND           | 75% (Overall)  | Age at disease onset, male sex, splenomegaly, thrombocytopenia                                                                                                                        | Male sex                                                                                                                                          | Overall mortality                                                 | Pearson's chi-square test (categorical variables)<br>Mann-Whitney U test (quantitative variables).                                                                                       | Multivariate logistic regression                                                                                                                   |
| Valade | 2015 | France  | 117      | ICU       | Hematologic conditions (73%)<br>Infectious diseases (20%)<br>Systemic diseases (5%)<br>Undetermined HLH etiology (2%) | 28% (ICU)    | 44% (Hospital) | Fibrinogen level <2 g/L, age >46 years, SOFA scores, worst PT                                                                                                                         | Fibrinogen level <2 g/L, age >46 years, SOFA scores                                                                                               | Coagulation disorders (hospital mortality)                        | Fisher's exact test (categorical variables)<br>Wilcoxon rank-sum tests (continuous variables)<br>Kaplan-Meier (Survival according to the fibrinogen level, prothrombin time, SOFA score) | Logistic regression model (backward stepwise procedure using all variables yielding p-values<0.20 in the univariate analysis)                      |

|         |      |        |     |          |                                                                                                                                                      |              |               |                                                                                                                                                                                    |                                                                                                                                                                                    |                                    |                                                                                                                                                                                                     |                                                                                                                                          |
|---------|------|--------|-----|----------|------------------------------------------------------------------------------------------------------------------------------------------------------|--------------|---------------|------------------------------------------------------------------------------------------------------------------------------------------------------------------------------------|------------------------------------------------------------------------------------------------------------------------------------------------------------------------------------|------------------------------------|-----------------------------------------------------------------------------------------------------------------------------------------------------------------------------------------------------|------------------------------------------------------------------------------------------------------------------------------------------|
| Otrock  | 2015 | US     | 73  | Hospital | <p>Malignancy (29%)</p> <p>Infection (41%)</p> <p>Autoimmunity (7%)</p> <p>Unknown (18%)</p>                                                         | 27% (30-day) | 52% (Overall) | <p>Male gender, age≥30 years, renal insufficiency, percent drop in serial ferritin of &lt;75%, malignancy-associated causes of HLH (overall mortality)</p>                         | <p>Malignancy-associated causes of HLH (overall mortality)</p> <p>Ferritin level&gt; 50,000 mg/L (30-day mortality)</p>                                                            | Overall mortality (30-d mortality) | <p>Pearson's Chi-square or Fisher's exact test (categorical variables)</p> <p>Student's t-test (continuous variables)</p> <p>Kaplan-Meier (Survival according to the malignancy-associated HLH)</p> | <p>Logistic regression (backward step-wise (Wald) selection procedure with significance level for removal from the model set at 0.1)</p> |
| Riviere | 2015 | France | 162 | Hospital | <p>Hematologic malignancies/Solid cancer (60%)</p> <p>Infections (25%)</p> <p>Systemic disease (3%)</p> <p>Other/unknown underlying disease (9%)</p> | 20% (30-day) | 42% (Overall) | <p>Hematologic malignancy-associated hemophagocytic syndrome has a poorer outcome than those with underlying infection</p>                                                         |                                                                                                                                                                                    | Thirty-day mortality               | <p>Kaplan-Meier (survival was compared between hematologic malignancies-associated and infection-associated hemophagocytic syndrome using the log-rank test)</p>                                    |                                                                                                                                          |
| Zhou    | 2017 | China  | 205 | Hospital | <p>Malignancies (58%)</p> <p>Infections (41%)</p> <p>Autoimmune disorders (7%)</p> <p>Unknown (7%)</p>                                               | 43% (30-day) | 64% (Overall) |                                                                                                                                                                                    | <p>Platelet, prothrombin time and malignancy (all patients)</p> <p>Direct bilirubin (elderly group)</p> <p>Prothrombin time,malignancy and lactate dehydrogenase (young group)</p> | Overall mortality                  | <p>Pearson's Chi-square and non-parametric tests (categorical variables)</p> <p>Mann-Whitney U test (continuous variables)</p> <p>Kaplan-Meier (Survival curves)</p>                                | Cox-regression method                                                                                                                    |
| Schram  | 2016 | US     | 68  | Hospital | <p>Malignancy (49%)</p> <p>Infection (33%)</p> <p>Autoimmune disease (28%)</p>                                                                       | 21% (30-day) | 69% (Overall) | <p>Malignancy-associated HLH had a worse survival compared to those without underlying cancer. There was a trend towards improved survival in patients who received etoposide.</p> |                                                                                                                                                                                    | Overall mortality                  | <p>Kaplan-Meier (survival analyses to compare subgroups using the log-rank test)</p>                                                                                                                |                                                                                                                                          |
